# Supplementary material for: Nfkbia-driven neuroinflammatory pathways mediate depression following spinal cord injury
Source: Front Mol Neurosci. 2025 Sep 4;18:1596649. doi: 10.3389/fnmol.2025.1596649 (PMC12443535; doi:10.3389/fnmol.2025.1596649)
Supplement: Supplementary file 2 [file Table_2.XLSX]

## Sheet: Sheet1
Supplementary Table 1. Differentially expressed genes in GSE45006 and GSE183386
GSE45006	GSE183386
Ppip5k1	Zbtb16
Ppil4	Tinagl1
Ppil3	Tac1
Ppil1	Syt6
Ppih	Sult1a1
Ppie	Sncg
Ppib	Slc5a7
Ppfibp1	Slc19a3
Ppfia3	Slc18a3
Ppdpf	Sgk1
Ppargc1a	Scn7a
Pou3f3	Pvalb
Postn	Psmb9
Por	Pla2g3
Pop7	Per1
Pop4	Pdk4
Pomt1	Pcdh20
Pomgnt2	Oxt
Polr2j	Nfkbia
Polr2i	Mmp14
Polr2g	Lrrn4cl
Polr2d	Lims2
Polr1d	Hif3a
Polg	Gpr34
Pold4	Gpr149
Pofut2	Gpd1
Podxl2	Fmo2
Poc1b	Fkbp5
Pnrc2	Errfi1
Pnpla8	Edn1
Pnpla3	Ddit4
Pnp	Cyp2j4
Pno1	Chrnb4
Pnmal2	Cdkn1a
Pnkp	Cd180
Pnkd	Bcl6
Pnisr	Apold1
Pnck	Acer2
Pmp22
Pmp2
Pmm2
Pml
Pmf31
Plxnc1
Plxnb2
Plxnb1
Plxna4
Plxna1
Plscr1
Pls1
Plppr3
Plppr2
Plpp5
Plpp4
Plpp1
Plod3
Plod2
Plod1
Plk2
Plin3
Plin2
Plgrkt
Plekho1
Plekhm3
Plekhm2
Plekhm1
Plekhg3
Plekhf2
Plekhd1
Plekhb1
Plekha6
Plek
Pld3
Pld1
Plcxd3
Plcxd2
Plcl1
Plch2
Plcd4
Plcd1
Plcb4
Plcb1
Plbd1
Plaur
Plau
Plag1
Pla2g4a
Pla2g3
Pla2g15
Pla1a
Pkp4
Pknox2
Pkn1
Pkia
Pkd2
Pja2
Pja1
Pitpnm2
Pitpnm1
Pithd1
Pisd
Pir
Pip5kl1
Pip5k1c
Pip5k1b
Pip4k2b
Pip4k2a
Pink1
Pim2
Pik3r3
Pik3c3
Pik3ap1
Pigy
Pigx
Pigu
Pigt
Pigbos1
Piezo1
Picalm
Pias3
Pianp
Pi4kb
Pi4ka
Pi4k2a
Pi16
Phyhip
Phospho2
Phospho1
Phlpp1
Phlda1
Phkg1
Phkb
Phgdh
Phf5a
Phf24
Phf23
Phf14
Phf13
Phc2
Phb2
Phactr3
Pgrmc2
Pgr
Pgp
Pgm2l1
Pgm2
Pgls
Pggt1b
Pgghg
Pgd
Pgbd5
Pgap2
Pfn2
Pfn1
Pfkp
Pfkm
Pfkfb3
Pfdn2
Pf4
Pex5l
Pex5
Pex19
Pes1
Pepd
Peo1
Pelo
Peli2
Pecam1
Pea15
Pdzrn4
Pdzd8
Pdzd4
Pdzd11
Pdxp
Pds5b
Pds5a
Pdrg1
Pdpn
Pdpk1
Pdp2
Pdlim7
Pdlim5
Pdlim4
Pdlim2
Pdk2
Pdia6
Pdhb
Pdha1
Pde7a
Pde4dip
Pde4d
Pde4b
Pde3b
Pde2a
Pde1b
Pde10a
Pdcd6ip
Pdcd6
Pdcd4
Pdcd2l
Pdcd2
Pdcd11
Pcyt1b
Pcsk6
Pcsk2
Pcsk1n
Pcp4l1
Pcp4
Pcolce
Pcnx4
Pcnx3
Pcnp
Pcna
Pcmt1
Pclo
Pcgf6
Pcgf5
Pcf11
Pced1b
Pcdhb9
Pcdha13
Pcdh9
Pcdh20
Pcdh19
Pcdh18
Pcdh17
Pccb
Pbx3
Pbdc1
Pawr
Patj
Parvb
Parp9
Parp6
Parp4
Parp2
Parp14
Parp12
Parp10
Parp1
Parn
Pard6a
Paqr9
Paqr8
Paqr7
Paqr6
Paqr4
Papola
Papd4
Paox
Pank4
Pank3
Pank2
Pank1
Pan3
Pam
Pak4
Pak3
Pak2
Pak1ip1
Pak1
Paip2b
Paip1
Pagr1
Pafah1b2
Padi2
Pacsin1
Pacs2
Pabpc4
Pabpc1
Pa2g4
P4htm
P4hb
P4ha2
P2ry6
P2ry2
P2rx6
P2rx4
Otud7b
Otud4
Otud1
Ostf1
Ostc
Ost4
Osgep
Oser1
Osbpl8
Osbpl6
Osbpl1a
Osbpl11
Ormdl2
Orc4
Orc2
Orai3
Orai1
Oplah
Ophn1
Opcml
Opa1
Omg
Oma1
Olr1
Olig1
Olfml3
Olfml1
Olfm3
Olfm1
Ogt
Ogfrl1
Ogfr
Ogfod3
Odf2
Odc1
Ocrl
Obfc1
Oas1a
Oaf
Nxt1
Nxph1
Nxpe3
Nxpe2
Nusap1
Nus1
Nup98
Nup93
Nup88
Nup85
Nup62
Nup54
Nup43
Nup37
Nup205
Nup160
Nup155
Nudt9
Nudt7
Nudt5
Nudt4
Nudt3
Nudt21
Nudt12
Nudt11
Nudt10
Nudcd2
Nucb2
Nubp2
Nubp1
Nub1
Ntrk2
Ntmt1
Ntm
Nthl1
Nt5e
Nt5dc2
Nt5dc1
Nt5c2
Nt5c
Nsmf
Nsmce1
Nsg2
Nsg1
Nsf
Nsdhl
Nsa2
Ns5atp9
Nrxn3
Nrxn1
Nrsn2
Nrsn1
Nrros
Nrp2
Nrp1
Nrn1
Nrip3
Nrip2
Nrgn
Nrg1
Nrf1
Nrcam
Nras
Nr3c2
Nr2c2ap
Nr2c1
Nr1h3
Nr1d2
Nr1d1
Nqo2
Nqo1
Npy5r
Nptx1
Npl
Npepps
Npepo
Npepl1
Npc2
Npas3
Npas2
Notch1
Nos1ap
Nop9
Nop58
Nop16
Nono
Nol9
Nol4
Nol11
Nod1
Noc2l
Nnt
Nnat
Nmt2
Nmt1
Nmrk1
Nmnat1
Nmi
Nme6
Nme2
Nln
Nlgn1
Nkiras2
Nkiras1
Nkd1
Nkain3
Nkain1
Nit2
Nit1
Nisch
Nipsnap3b
Nipsnap1
Nipal2
Nipa2
Nip7
Ninj2
Ninj1
Nim1k
Nifk
Nid1
Nicn1
Nhsl2
Nhp2
Nhlrc3
Ngrn
Ngfr
Ngb
Nfyb
Nfya
Nfu1
Nfkbib
Nfkbia
Nfkb2
Nfil3
Nfic
Nfia
Nfe2l2
Nfe2l1
Nfatc2
Nfatc1
Nfam1
Nexn
Neurl1
Neto2
Neto1
Nes
Nell2
Nell1
Nelfe
Nek7
Nek6
Negr1
Nefm
Nefl
Nefh
Nedd4l
Nedd1
Nectin3
Necap2
Necap1
Necab3
Necab2
Ndufs3
Ndufs1
Ndufaf7
Ndufa8
Ndufa7
Ndufa4
Ndrg4
Ndrg3
Ndrg2
Ndrg1
Ndn
Nde1
Ndc1
Ncstn
Ncs1
Ncoa7
Ncoa1
Ncln
Nckipsd
Nckap1l
Nckap1
Nck1
Ncf4
Ncf1
Ncdn
Ncbp2
Ncaph2
Ncapd2
Ncan
Ncam2
Ncam1
Ncald
Nbn
Nbea
Nav1
Nat8l
Nat8f5
Nat8f3
Nat8f1
Nat10
Nat1
Nasp
Naprt
Napg
Napb
Nap1l5
Nap1l3
Nap1l2
Nampt
Nalcn
Naglu
Nagk
Naga
Nadk2
Nadk
Nacc2
Nabp1
Nab2
Naaa
Naa30
Naa20
N4bp2l2
N4bp2
N4bp1
Myt1l
Myrip
Mypop
Myof
Myoc
Myo9b
Myo7a
Myo6
Myo1f
Myo1e
Myo1d
Myo1c
Myl12a
Myh9
Myh10
Myh1
Mydgf
Myd88
Mycbp2
Mycbp
Myc
Mybbp1a
Myadm
Mxra8
Mx1
Mvp
Mvk
Mvb12b
Mvb12a
Mut
Mtx1
Mtus2
Mturn
Mtss1l
Mtrf1
Mtpap
Mtmr7
Mtmr4
Mtmr2
Mtmr12
Mthfs
Mthfr
Mtfr1
Mtf1
Mtcl1
Mtch2
Mtap
Mta3
Mta2
Mt3
Mt2A
Mt1
Msrb2
Msrb1
Msn
Msmo1
Msl3l2
Msl3
Msh2
Ms4a6a
Mrto4
Mrps6
Mrps24
Mrps16
mrpl9
Mrpl58
Mrpl52
Mrpl32
mrpl24
Mrpl23
Mrpl22
Mrpl17
Mro
Mreg
Mrc1
Mras
Mrap2
Mpzl1
Mpv17l2
Mpv17l
Mpst
Mpped2
Mpped1
Mpp7
Mpp6
Mpp5
Mpp3
Mpp2
Mplkip
Mpi
Mphosph8
Mphosph10
Mpg
Mpeg1
Mospd3
Morn4
Mon2
Mok
Mog
Mobp
Mob4
Mob3a
Mnt
Mnda
Mms19
Mmrn2
Mmp24
Mmp2
Mmp19
Mmp14
Mmp12
Mmgt2
Mmd2
Mlxip
Mlx
Mllt3
Mllt11
Mlec
Mknk2
Mknk1
Mkln1
Mkks
Mki67
Mitd1
Mir384
Mir29c
Mir23b
Minpp1
Mina
Miga2
Miga1
Mif4gd
Mief2
Mief1
Midn
Micu3
Mical1
Miat
Mia3
Mgst3
Mgst2
Mgp
Mgmt
Mgea5
MGC109340
MGC105649
Mgat4b
Mgat2
Mgat1
Mfsd6
Mfsd5
Mfsd3
Mfsd14b
Mfsd12
Mfsd11
Mfsd1
Mfge8
Mfap3
Mex3c
Mettl9
Mettl3
Mettl2b
Mettl26
Metrnl
Mest
Mertk
Memo1
Meis3
Meis2
Meis1
Mef2a
Med8
Med29
Med21
Med16
Med15
Med14
Med13l
Med13
Med12
Med11
Mecp2
Mecom
Me3
Me2
Me1
Mdp1
Mdm2
Mdm1
Mdh1
Mdga2
Mdfic
Mdc1
Mcur1
Mcub
Mcrs1
Mcm7
Mcm6
Mcm4
Mcm2
Mcl1
Mcfd2
Mcf2l
Mcf2
Mcam
Mboat2
Mboat1
Mbd5
Mbd2
Mb21d2
Maz
Max
Matn2
Mast4
MAST1
Masp1
Mark1
Marcks
Mapt
Mapre3
Mapre2
Mapre1
Mapkapk3
Mapkapk2
Mapk9
Mapk8ip3
Mapk8ip1
Mapk8
Mapk4
Mapk1ip1l
Mapk12
Mapk1
Map7d2
Map6
Map4k2
Map4k1
Map3k3
Map3k11
Map2k6
Map2k3
Map2
Map1b
Map1a
Manf
Maneal
Manba
Man2b1
Man2a1
Man1c1
Man1a1
Maml2
Mall
Mal2
Mal
Mak16
Magoh
Magi3
Magi2
Magi1
Mageh1
Magee1
Maged1
Mafk
Maff
Mafb
Maf
Madd
Mad2l2
Mad2l1bp
Mad1l1
Macrod1
Mab21l2
Mab21l1
Lzts1
Lyz2
Lyve1
Lysmd4
Lysmd3
Lysmd2
Lyrm7
Lyrm5
Lyrm2
Lypla1
Lynx1
Lyn
Lyl1
Lyar
Ly96
Ly86
Ly6h
Luzp2
Luzp1
Luc7l
Ltbr
Ltbp1
Lta4h
Lst1
Lss
Lsp1
Lsm8
Lsm5
Lsm3
Lsm2
Lsm11
Lsm10
Lsamp
Lrwd1
Lrsam1
Lrrn3
Lrrn2
Lrrfip2
Lrrfip1
Lrrc8d
Lrrc8c
Lrrc8b
Lrrc59
Lrrc4c
Lrrc4b
Lrrc49
Lrrc42
Lrrc41
Lrrc40
Lrrc4
Lrrc24
Lrp3
Lrp11
Lrp10
Lrg1
Lrfn5
Lrch1
Lpxn
Lpl
Lpin1
Lpcat3
Lpcat1
Lpar6
Loxl2
Loxl1
Lox
LOC691995
LOC691658
LOC691170
LOC691143
LOC691113
LOC690422
LOC688637
LOC686774
LOC685152
LOC685067
LOC683897
LOC683508
LOC681367
LOC681282
LOC680254
LOC680039
LOC679811
LOC678774
LOC64038
LOC619574
LOC501038
LOC500956
LOC498507
LOC498154
LOC365985
LOC361635
LOC361016
LOC314140
LOC308990
LOC306766
LOC302192
LOC302022
LOC301861
LOC288913
LOC108351584
LOC103690154
LOC102557177
LOC102556290
LOC102556259
LOC102556224
LOC102556092
LOC102555797
LOC102555727
LOC102555644
LOC102555617
LOC102555520
LOC102555400
LOC102555246
LOC102555086
LOC102554700
LOC102554630
LOC102554622
LOC102554315
LOC102553917
LOC102553820
LOC102553515
LOC102553298
LOC102553190
LOC102552920
LOC102552888
LOC102552880
LOC102552818
LOC102552369
LOC102551863
LOC102551731
LOC102551716
LOC102549575
LOC102549407
LOC102549278
LOC102549198
LOC102549069
LOC102548740
LOC102548389
LOC102548084
LOC102547986
LOC102547322
LOC102546864
LOC100913073
LOC100912950
LOC100912577
LOC100912517
LOC100912483
LOC100912446
LOC100912222
LOC100912219
LOC100912167
LOC100912151
LOC100912140
LOC100912002
LOC100911992
LOC100911865
LOC100911798
LOC100911627
LOC100911033
LOC100910990
LOC100910827
LOC100910792
LOC100910774
LOC100910558
LOC100910532
LOC100910506
LOC100910054
LOC100910033
LOC100909866
LOC100909830
LOC100909788
LOC100363521
LOC100363441
LOC100363248
LOC100363228
LOC100362819
LOC100362814
LOC100362572
LOC100362342
LOC100361913
LOC100360205
LOC100359980
LOC100302372
LOC100151767
LOC100125365
LOC100125362
Lnx1
Lmtk2
Lmo4
Lmo2
Lmnb1
Lmna
Lmf2
Lmcd1
Lmbrd1
Lman2
Llph
Lix1
Litaf
Lipa
Lingo2
Lingo1
Lin7b
Lin54
Lin52
Lims1
Limk1
Lime1
Limd2
Limd1
Limch1
Lima1
Lilrb4
Lig1
Lias
Lhfpl2
Lgmn
Lgi3
Lgi1
Lgals8
Lgals3bp
Lgals3
Lgals1
Letm2
Leprotl1
Leprot
Lemd2
Ldhb
Ldha
Ldb2
Lcp2
Lcp1
Lcn2
Lbp
Lbhd1
Lasp1
Larp6
Large1
Laptm5
Lap3
Lancl2
Lancl1
Lamtor5
Lamtor3
Lamp5
Lamp2
Lamc1
Lamb1
Lama4
Lactb
L1cam
Kxd1
Kti12
Krtcap2
Krt10
Kri1
Krcc1
Kpnb1
Kpna4
Kpna1
Kndc1
Klra5
Klhl8
Klhl7
Klhl4
Klhl32
Klhl30
Klhl23
Klhl20
Klhl15
Klhl12
Klhdc7a
Klhdc3
Klhdc2
Klf9
Klf6
Klf5
Klf3
Klf12
Klf11
Klf10
Klc2
Klc1
Kirrel3
Kifc2
Kifap3
Kif5c
Kif5b
Kif5a
Kif3c
Kif3a
Kif2a
Kif26b
Kif22
Kif21a
Kif20b
Kif20a
Kif1bp
Kif1a
Kidins220
Kiaa0895l
Khdrbs3
Khdrbs2
Kdm6b
Kdm2b
Kdelr3
Kdelr2
Kdelr1
Kdelc2
Kctd9
Kctd4
Kctd3
Kctd17
Kctd14
Kctd12
Kctd11
Kcnt1
Kcns3
Kcnq5
Kcnq3
Kcnn4
Kcnk3
Kcnk1
Kcnj6
Kcnj16
Kcnj14
Kcnj11
Kcnj10
Kcnip4
Kcnip1
Kcnh2
Kcnd2
Kcnc4
Kcnc3
Kcnc2
Kcnc1
Kcnab3
Kcnab2
Kcnab1
Kcna6
Kcna2
Kcna1
Kbtbd3
Kazn
Katna1
Kars
Kank2
Junb
Jun
Jtb
Jph3
Jarid2
Jakmip2
Jakmip1
Jak2
Jag1
Iws1
Itsn1
Itgb2
Itgb1bp1
Itgb1
Itgax
Itgam
Itgal
Itga1
Itfg1
Isy1
Ispd
Isoc1
Isg15
Isca1
Irs2
Irgq
Irgm2
Irgm
Irf9
Irf8
Irf7
Irf5
Irf3
Irf2bpl
Irf2bp1
Irf1
Irak2
Iqsec3
Iqsec1
Iqgap2
Iqgap1
Ipp
Ipo5
Ints6l
Insig2
Insig1
Inppl1
Inpp5f
Inpp5d
Inpp4b
Inpp4a
Ino80c
Ino80
Inmt
Inip
Inhbb
Inf2
Ina
Impdh2
Impact
Imp4
Ilvbl
Ilk
Ildr2
Il6r
Il4r
Il33
Il1rap
Il1r1
Il18bp
Il18
Il17ra
Il10rb
Il10ra
Ikbkb
Igtp
Igsf6
Igsf21
Igip
Igf2r
Igdcc4
Ift80
Ift46
Ift43
Ift172
Ifrd2
Ifrd1
Ifngr2
Ifngr1
Ifnar2
Ifnar1
Ifitm3
Ifitm2
Ifitm10
Ifitm1
Ifit3
Ifi35
Ifi30
Ifi27l2b
Ifi27
Ier5l
Ier5
Ier3
Ier2
Ids
Idi1
Idh3B
Idh3a
Idh2
Id4
Icam1
Ica1
Iah1
Hyal2
Hus1
Htra2
Htr2c
Htr2b
Hsph1
Hspbp1
Hspb8
Hspb6
Hspb1
Hspa4l
Hspa12a
Hsf4
Hsd3b7
Hsd17b7
Hsd11b1
Hs3st2
Hs2st1
Hs1bp3
Hrct1
Hrasls
Hr
Hpse
Hps1
Hpcal4
Hpca
Hoxd8
Hoxd1
Hoxc9
Hoxc8
Hoxb6
Hoxa9
Hoxa5
Hopx
Hook1
Homer3
Hnrnpul1
Hnrnpf
Hnrnpab
Hnrnpa3
Hnrnpa1
Hnmt
Hn1
Hmox2
Hmox1
Hmgxb4
Hmgn2
Hmgcs1
Hmgcl
Hmces
Hmbs
Hm13
Hlx
Hlf
Hk2
Hk1
Hist2h2be
Hist1h1c
Hirip3
Hip1
Hint3
Hilpda
Higd1a
Hif1a
Hibadh
Hhip
Hhex
Hhatl
Hgsnat
Hexa
Hes1
Herc3
Herc2
Herc1
Hepacam
Helb
Hecw2
Hecw1
Hectd4
Hebp2
Hebp1
Heatr5b
Heatr5a
Heatr1
Hdlbp
Hdac11
Hdac1
Hcst
Hcn2
Hcn1
Hcls1
Hck
Hcfc2
Hbp1
Haus8
Haus1
Hat1
Hapln4
Hapln2
Hapln1
Hap1
Hagh
Hacl1
Hace1
Hacd4
Hacd3
Habp4
H2afz
H2afy
H2afj
H1f0
Gypc
Gusb
Gucy1b3
Gucy1a3
Gucd1
Gtpbp4
Gtpbp10
Gtf3c1
Gtf3a
Gtf2h3
Gtf2h1
Gtf2f2
Gstz1
Gstt3
Gsto1
Gstm7
Gstm1
Gsta1
Gss
Gspt2
Gsdmd
Gsap
Grn
Grm8
Grm7
Grm3
Grm1
Grk6
Gripap1
Grip2
Grin3a
Grin2d
Grin2c
Grin2a
Grin1
Grik4
Grik2
Gria4
Gria3
Gria2
Gria1
Grhpr
Grem2
Greb1l
Grb14
Grb10
Gramd1b
Gpx8
Gpx7
Gpx1
Gpt2
Gpsm3
Gps2
Gprin1
Gprc5b
Gprasp2
Gprasp1
Gpr85
Gpr84
Gpr68
Gpr62
Gpr61
Gpr37l1
Gpr37
Gpr162
Gpr158
Gpr155
Gpr149
Gpr137
Gpr108
Gpnmb
Gpn2
Gpm6b
Gpm6a
Gpld1
Gphn
Gpc6
Gpatch4
Got1
Golt1b
Gns
Gnptab
Gnpda1
Gnpat
Gnl3
Gnl2
Gngt2
Gng8
Gng5
Gng3
Gng2
Gng13
Gng12
Gne
Gnb5
Gnb4
Gnb2
Gnb1
Gnaz
Gnas
Gnaq
Gnao1
Gnal
Gnai2
Gnai1
Gna15
Gna14
Gmps
Gmppa
Gmnn
Gmfg
Gmcl1
Gm2a
Glud1
Gltscr2
Glt8d1
Gls2
Gls
Glrx2
Glrx
Glrb
Glra2
Glra1
Glmp
Glipr1
Glcci1
Glb1
Gkap1
Gjc2
Gjb6
Git2
Gins4
Ginm1
Gigyf2
Ghitm
Ggta1
Ggt7
Ggps1
Gga1
Gfra2
Gfod2
Gemin5
Gem
Gdpd1
Gdi1
Gdf11
Gdap2
Gdap1
Gda
Gcs1
Gcnt2
Gcnt1
Gclc
Gch1
Gcc2
Gca
Gbp2
Gbe1
Gba2
Gba
Gatsl2
Gatc
Gatad2a
Gas7
Gas2
Gart
Garnl3
Gar1
Gapvd1
Galnt6
Galnt2
Galk2
Galk1
Galc
Gak
Gadd45g
Gadd45b
Gadd45a
Gad2
Gad1
Gabrg2
Gabrb3
Gabrb2
Gabrb1
Gabra5
Gabra2
Gabra1
Gabpb1
Gabbr2
Gabbr1
Gabarapl1
Gabarap
G6pd
G3bp2
G3bp1
G0s2
Fzd1
Fyttd1
Fyn
Fyb
Fxyd7
Fxyd5
Fxyd2
Fxr2
Fut9
Fut4
Furin
Fundc2
Fundc1
Fuca1
Fubp1
Fto
Fstl5
Fsd1l
Fsd1
Fry
Frs3
Frrs1
Frmd8
Frmd5
Fpgs
Foxp1
Foxo1
Fos
Folr2
Folh1
Fnip2
Fndc5
Fndc3b
Fndc10
Fnbp4
Fnbp1
Fn3krp
Fn3k
Fn1
Fmnl1
Flywch2
Flywch1
Flt3
Flrt1
Flot1
Flnc
Flna
Fli1
Fkbp5
Fkbp2
Fkbp1b
Fkbp1a
Fkbp15
Fkbp11
Fkbp10
Fitm2
Filip1l
Fibp
Fhod3
Fhod1
Fhl3
Fhl2
Fhdc1
Fgr
Fgl2
Fggy
Fgfrl1
Fgfr3
Fgfr2
Fgf9
Fgf14
Fgf13
Fgf12
Fgf1
Fgd2
Fez2
Fez1
Fermt3
Fdx1
Fdft1
Fcrl2
Fcna
Fcho1
Fcgrt
Fcgr3a
Fcgr2b
Fcgr1a
Fcf1
Fcer1g
Fbxw7
Fbxw17
Fbxo9
Fbxo6
Fbxo46
Fbxo45
Fbxo44
Fbxo41
Fbxo4
Fbxo33
Fbxo32
Fbxo31
Fbxo30
Fbxo3
Fbxo22
Fbxo21
Fbxo2
Fbxo18
Fbxo15
Fbxl6
Fbxl15
Fbn1
Fbln2
Fbl
Fastkd2
Fasn
Farsa
Fam96a
Fam8a1
Fam89b
Fam81a
Fam76b
Fam76a
Fam69b
Fam63b
Fam63a
Fam57b
Fam49b
Fam46c
Fam46b
Fam46a
Fam43b
Fam43a
Fam3c
Fam32a
Fam29a
Fam234b
Fam222a
Fam219b
Fam216a
Fam213b
Fam210a
Fam20c
Fam207a
Fam19a5
Fam19a2
Fam19a1
Fam198b
Fam193a
Fam189b
Fam188a
Fam184a
Fam179b
Fam171b
Fam171a1
Fam168b
Fam168a
Fam167a
Fam163b
Fam155a
Fam13b
Fam13a
Fam134a
Fam131b
Fam129b
Fam127c
Fam126b
FAM120C
Fam120b
Fam118b
Fam111a
Fam110b
Fam110a
Fam105a
Fam104b
Fam104a
Fam103a1
Faim2
Fads3
Fads1
Fadd
Fabp5
Fabp4
Fa2h
F8
F3
F13a1
Ezr
Ezh2
Ezh1
Eya1
Extl3
Extl2
Extl1
Ext2
Ext1
Exph5
Exosc8
Exosc5
Exosc4
Exoc8
Exoc6b
Exo5
Exd2
Evl
Evi5l
Evi2b
Eva1b
Etv5
Etv3
Etv1
Ets2
Ets1
Etnk1
Etl4
Etfbkmt
Etf1
Esyt1
Esrrg
Esm1
Esf1
Errfi1
Erp44
Erp29
Ero1b
Ero1a
Ermn
Ermard
Erlin1
Erich3
Erh
Erf
Ercc6
Erbin
Erap1
Epsti1
Eps15
Eprs
Epn2
Epm2aip1
Ephb6
Epha5
Epha4
Epdr1
Epb41l3
Epb41l1
Epb41
Eny2
Entpd6
Entpd5
Entpd4
Entpd3
Entpd1
Enpp5
Enpp4
Enpp3
Enpp2
Enho
Eng
Endod1
Enah
Emp3
Emp2
Emp1
Eml4
Eml3
Eml2
Eml1
Emg1
Emd
Emc9
Emc10
Emc1
Emb
Elp5
Elovl6
Elovl5
Elovl2
Elof1
Elmod1
Elmo2
Elmo1
Ell
Elk4
Elk3
Elfn2
Elf1
Elavl4
Elavl3
Elavl2
Elavl1
Eif5a2
Eif5a
Eif4ebp3
Eif4ebp1
Eif4e2
Eif4b
Eif4a3
Eif4a2
Eif3m
Eif3l
Eif3k
Eif3i
Eif3f
Eif3d
Eif3c
Eif3b
Eif2s2
Eif2s1
Eif2d
Eif2b1
Eif2ak2
Eif2a
Eif1b
Eif1ad
Eif1a
Eid2
Ehd4
Ehd2
Ehbp1l1
Ehbp1
Egr2
Egr1
Egln3
Eftud2
Efr3b
Efr3a
Efnb3
Efna5
Efemp2
Eef2k
Eef2
Eef1g
Eef1e1
Eef1d
Eef1b2
Eef1a2
Eed
Edil3
Edem2
Edem1
Eci3
Echdc1
Ece2
Ece1
Ebpl
Ebf2
Ebf1
Eaf1
E2f5
E2f4
Dzip3
Dzip1
Dyrk2
Dyrk1a
Dynlt3
Dynlt1
Dynll2
Dync1li2
Dync1i1
Dusp6
Dusp15
Dusp11
Dus2
Dus1l
Dtymk
Dtx4
Dtx3l
Dtnb
Dtna
Dtd1
Dstyk
Dst
Dscr3
Dscc1
Dscam
Dsc2
Dram2
Dram1
Dpysl4
Dpp8
Dpp7
Dpp6
Dpp10
Dpm2
Dph3
Dpcd
Dpagt1
Dopey1
Dok1
Dohh
Dock9
Dock8
Dock5
Dock3
Dock11
Dnph1
Dnpep
Dnmt1
Dnm3
Dnm1l
Dnm1
Dnase2
Dnase1l1
Dnal1
Dnajc7
Dnajc6
Dnajc5
Dnajc3
Dnajc27
Dnajc21
Dnajc14
Dnajc13
Dnajc12
Dnajc1
[truncated: 992 more rows]
